# Supplementary material
Source: Springer Nature journal article supplement (https://www.springermedizin.de/resource/supplementary/12935_2012_407_MOESM1_ESM.pdf/9540548)

A

K562

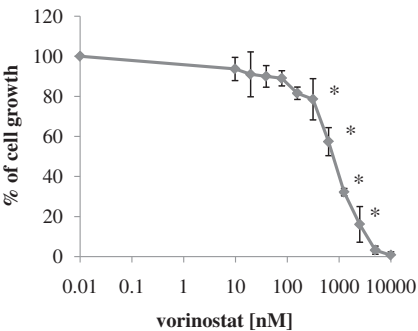

BaF3 T315I

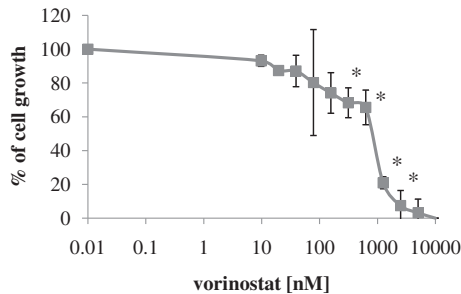

B

K562

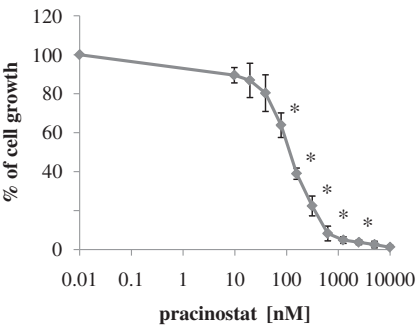

BaF3 T315I

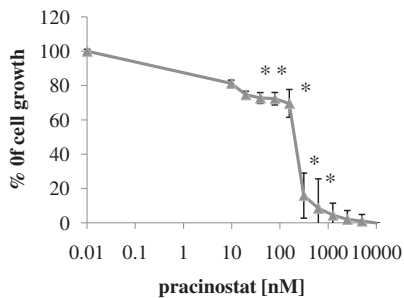

C

K562

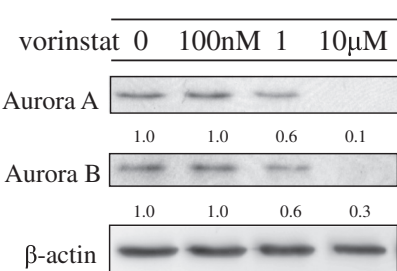

K562

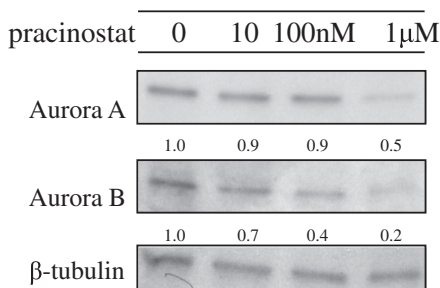

Supplement: MOESM1 [file 9540548]
